# Supplementary material
Source: PubMed Central journal article supplement (PMC5489244)
Supplement: NIHMS866654-supplement-1.pdf [file NIHMS866654-supplement-1.pdf]

**Supplemental Table 1**

| <b>Percent X Inactivation using the Androgen Receptor Assay (First Allele)</b> |                  |                       |                 |                 |                 |     |     |     |
|--------------------------------------------------------------------------------|------------------|-----------------------|-----------------|-----------------|-----------------|-----|-----|-----|
| <b>Germ layer</b>                                                              | <b>Tissue</b>    | <b>Subjects (age)</b> |                 |                 |                 |     |     |     |
|                                                                                |                  | 20 wk gestation       | 22 wk gestation | 27 wk gestation | 34 wk gestation | 4 d | 7 d | 8 d |
| <i>Ectoderm</i>                                                                | brain (cerebrum) | 59                    | 24              |                 | 28              |     |     | 42  |
|                                                                                | peripheral nerve |                       |                 |                 |                 |     |     |     |
|                                                                                | spinal cord      |                       | 21              |                 |                 |     |     |     |
|                                                                                | skin             | 81                    | 28              |                 | 39              | 69  | 82  | 31  |
|                                                                                | breast           |                       |                 |                 |                 |     |     |     |
| <i>Mesoderm</i>                                                                | blood            | 63                    |                 |                 |                 | 35  |     | 30  |
|                                                                                | adrenal          | 87                    | 22              |                 | 15              |     | 44  |     |
|                                                                                | spleen           | 83                    | 28              |                 |                 | 40  | 80  | 34  |
|                                                                                | skeletal muscle  | 71                    |                 |                 |                 |     |     | 47  |
|                                                                                | diaphragm        |                       |                 | 61              | 17              |     |     |     |
|                                                                                | psoas muscle     |                       | 27              | 57              | 19              | 55  | 70  |     |
|                                                                                | tongue           |                       | 21              | 54              | 27              |     |     |     |
|                                                                                | vertebrae        |                       |                 | 81              | 29              |     |     |     |
|                                                                                | rib              |                       | 31              | 81              | 19              |     |     |     |
|                                                                                | cartilage        |                       |                 |                 |                 | 53  |     |     |
|                                                                                | adipose          | 71                    |                 |                 |                 |     |     | 37  |
|                                                                                | kidney           | 76                    | 21              |                 |                 | 60  | 61  | 50  |
|                                                                                | uterus           |                       |                 |                 |                 | 63  | 72  | 46  |
|                                                                                | ovary            | 84                    |                 | 76              |                 |     | 56  |     |
|                                                                                | heart            | 67                    | 38              |                 |                 | 56  | 75  | 33  |
| aorta                                                                          |                  |                       |                 |                 | 65              | 58  |     |     |
| <i>Endoderm</i>                                                                | thymus           | 60                    | 31              |                 |                 |     | 74  |     |
|                                                                                | thyroid          |                       |                 |                 |                 |     |     |     |
|                                                                                | lung             | 80                    | 31              |                 | 36              |     | 73  | 49  |
|                                                                                | urinary bladder  |                       |                 |                 |                 | 57  | 62  | 36  |
|                                                                                | vagina           |                       |                 |                 |                 | 58  |     |     |
|                                                                                | liver            | 64                    | 25              | 65              |                 | 59  | 73  | 49  |
|                                                                                | pancreas         | 70                    | 28              |                 |                 |     | 48  | 37  |
|                                                                                | stomach          | 77                    | 26              | 60              |                 |     | 82  |     |
|                                                                                | esophagus        |                       |                 | 76              | 26              |     |     |     |
|                                                                                | small intestine  |                       | 30              | 63              | 16              | 58  |     |     |
|                                                                                | large intestine  | 69                    |                 | 76              |                 |     | 65  |     |
|                                                                                | gall bladder     |                       |                 |                 |                 |     |     |     |
| appendix                                                                       |                  |                       |                 |                 |                 |     |     |     |

**Supplemental Table 1 (continued)**

| <b>Percent X Inactivation using the Androgen Receptor Assay (First Allele)</b> |                  |                       |    |    |    |    |     |     |     |     |     |
|--------------------------------------------------------------------------------|------------------|-----------------------|----|----|----|----|-----|-----|-----|-----|-----|
| <b>Germ layer</b>                                                              | <b>Tissue</b>    | <b>Subjects (age)</b> |    |    |    |    |     |     |     |     |     |
|                                                                                |                  | 5 wk                  | 2y | 5y | 6y | 8y | 15y | 17y | 18y | 19y | 25y |
| <i>Ectoderm</i>                                                                | brain (cerebrum) | 68                    | 26 | 59 |    | 50 | 52  | 56  | 47  | 22  | 37  |
|                                                                                | peripheral nerve |                       |    |    |    |    | 57  |     | 65  |     |     |
|                                                                                | spinal cord      |                       |    |    |    |    |     |     |     |     |     |
|                                                                                | skin             | 57                    | 25 | 64 | 49 |    | 55  |     | 70  |     |     |
|                                                                                | breast           |                       |    |    |    |    |     |     |     |     |     |
| <i>Mesoderm</i>                                                                | blood            | 46                    |    |    | 29 |    |     |     |     |     |     |
|                                                                                | adrenal          |                       | 43 |    | 31 |    |     |     | 58  |     |     |
|                                                                                | spleen           | 46                    | 30 | 34 | 25 |    | 62  | 51  | 64  | 16  | 42  |
|                                                                                | skeletal muscle  | 47                    |    |    | 29 |    |     |     |     |     |     |
|                                                                                | diaphragm        |                       |    |    |    |    |     |     |     |     |     |
|                                                                                | psoas muscle     |                       | 18 | 58 |    | 75 | 58  |     | 58  | 27  |     |
|                                                                                | tongue           |                       |    |    |    |    | 55  |     | 78  |     |     |
|                                                                                | vertebrae        |                       |    |    |    |    |     |     |     |     |     |
|                                                                                | rib              |                       |    |    |    |    |     |     |     |     |     |
|                                                                                | cartilage        |                       |    |    |    |    |     |     |     |     |     |
|                                                                                | adipose          |                       | 24 | 55 | 31 |    |     |     | 70  | 19  |     |
|                                                                                | kidney           | 66                    | 7  | 56 | 35 | 75 | 84  |     | 76  | 50  |     |
|                                                                                | uterus           | 65                    | 22 |    |    |    |     | 68  | 58  |     |     |
|                                                                                | ovary            | 45                    |    |    | 21 | 80 |     |     |     |     | 21  |
|                                                                                | heart            | 45                    |    | 46 | 41 |    | 56  | 65  | 66  |     | 32  |
| aorta                                                                          |                  |                       |    |    |    |    |     |     | 45  |     |     |
| <i>Endoderm</i>                                                                | thymus           | 54                    |    |    | 29 |    |     | 43  | 79  |     |     |
|                                                                                | thyroid          |                       |    |    |    |    |     |     |     |     |     |
|                                                                                | lung             | 31                    | 20 |    |    |    | 55  |     | 80  | 39  |     |
|                                                                                | urinary bladder  |                       |    |    |    |    |     |     |     |     |     |
|                                                                                | vagina           |                       |    |    |    |    |     |     |     |     |     |
|                                                                                | liver            | 36                    | 40 | 73 | 50 | 88 |     | 61  |     | 23  | 43  |
|                                                                                | pancreas         | 44                    | 10 |    | 12 |    |     |     |     |     |     |
|                                                                                | stomach          | 45                    |    |    | 42 |    |     |     |     | 39  |     |
|                                                                                | esophagus        |                       | 26 |    |    |    |     |     |     |     |     |
|                                                                                | small intestine  |                       |    |    |    |    |     | 62  |     |     |     |
|                                                                                | large intestine  | 48                    |    |    | 35 | 68 | 46  |     | 62  |     |     |
|                                                                                | gall bladder     |                       |    |    |    | 63 |     |     |     |     |     |
|                                                                                | appendix         |                       |    |    | 35 |    |     |     |     |     |     |

**Supplemental Table 1 (continued)**

| <b>Percent X Inactivation using the Androgen Receptor Assay (First Allele)</b> |                  |                       |     |     |     |     |     |     |     |     |
|--------------------------------------------------------------------------------|------------------|-----------------------|-----|-----|-----|-----|-----|-----|-----|-----|
| <b>Germ layer</b>                                                              | <b>Tissue</b>    | <b>Subjects (age)</b> |     |     |     |     |     |     |     |     |
|                                                                                |                  | 29y                   | 33y | 36y | 42y | 47y | 53y | 61y | 79y | 82y |
| <i>Ectoderm</i>                                                                | brain (cerebrum) | 54                    | 44  | 61  | 48  |     | 28  | 41  |     |     |
|                                                                                | peripheral nerve | 51                    |     |     |     |     |     |     |     |     |
|                                                                                | spinal cord      |                       |     |     |     |     |     |     |     |     |
|                                                                                | skin             |                       | 55  |     |     |     |     | 34  |     | 54  |
|                                                                                | breast           | 33                    |     | 62  |     |     |     |     |     | 38  |
| <i>Mesoderm</i>                                                                | blood            |                       |     |     |     |     |     | 14  |     | 35  |
|                                                                                | adrenal          | 51                    | 47  |     |     | 69  |     |     |     | 52  |
|                                                                                | spleen           | 50                    | 42  | 55  | 38  | 43  | 76  | 18  |     | 48  |
|                                                                                | skeletal muscle  |                       |     |     |     |     |     | 52  |     |     |
|                                                                                | diaphragm        |                       |     |     |     |     |     |     |     | 67  |
|                                                                                | psoas muscle     | 64                    |     | 58  |     | 63  | 36  |     | 83  |     |
|                                                                                | tongue           |                       |     |     |     |     |     |     |     |     |
|                                                                                | vertebrae        |                       |     |     |     |     |     |     |     |     |
|                                                                                | rib              |                       |     |     |     |     |     |     |     |     |
|                                                                                | cartilage        |                       |     |     |     |     |     |     |     |     |
|                                                                                | adipose          |                       |     | 73  |     |     |     |     |     |     |
|                                                                                | kidney           | 39                    |     | 51  | 30  | 51  | 22  | 34  | 80  | 65  |
|                                                                                | uterus           | 53                    |     | 46  |     |     |     |     |     |     |
|                                                                                | ovary            | 57                    | 50  |     | 54  | 59  |     | 75  |     |     |
|                                                                                | heart            |                       | 42  | 62  | 39  | 72  | 40  | 28  | 57  | 30  |
| aorta                                                                          |                  |                       |     |     |     |     |     |     |     |     |
| <i>Endoderm</i>                                                                | thymus           |                       |     |     |     |     |     |     |     |     |
|                                                                                | thyroid          |                       |     |     |     | 51  |     |     |     |     |
|                                                                                | lung             | 61                    |     |     | 61  |     | 56  | 22  | 68  |     |
|                                                                                | urinary bladder  |                       |     |     |     |     |     |     |     | 70  |
|                                                                                | vagina           |                       |     |     |     |     |     |     |     |     |
|                                                                                | liver            | 21                    | 48  | 55  | 28  | 65  | 32  | 18  | 85  | 63  |
|                                                                                | pancreas         |                       |     | 40  | 52  | 51  | 50  |     |     | 67  |
|                                                                                | stomach          |                       |     |     |     |     |     |     |     | 65  |
|                                                                                | esophagus        | 83                    |     |     |     |     |     |     |     |     |
|                                                                                | small intestine  |                       |     |     |     |     |     |     |     |     |
|                                                                                | large intestine  |                       | 40  |     |     |     |     |     |     |     |
|                                                                                | gall bladder     |                       |     |     |     |     |     |     |     |     |
| appendix                                                                       |                  |                       |     |     |     |     |     |     |     |     |
