# Supplementary material
Source: PubMed Central journal article supplement (PMC5489244)
Supplement: NIHMS866654-supplement-2.pdf [file NIHMS866654-supplement-2.pdf]

**Supplementary Figure 1** Scatterplot of X-chromosome inactivation values for blood/spleen vs. skin.

**Supplementary Figure 2** Scatterplot of X-chromosome inactivation values for blood/spleen vs. heart.

**Supplementary Figure 3** Scatterplot of X-chromosome inactivation values for blood/spleen vs. lung.

**Supplementary Figure 4.** Scatterplot of X-chromosome inactivation values for blood/spleen vs. muscle.

**Supplementary Figure 5.** Scatterplot of X-chromosome inactivation values for blood/spleen vs. esophagus/stomach/intestine.

**Supplementary Figure 6.** Scatterplot of X-chromosome inactivation values for blood/spleen vs. kidney.

**Supplementary Figure 7.** Scatterplot of X-chromosome inactivation values for blood/spleen vs. liver.

Lines are +/- 10% variation in allele inactivation to allow for technical variation. When both blood and spleen were available from an individual, the X-chromosome inactivation values were averaged.

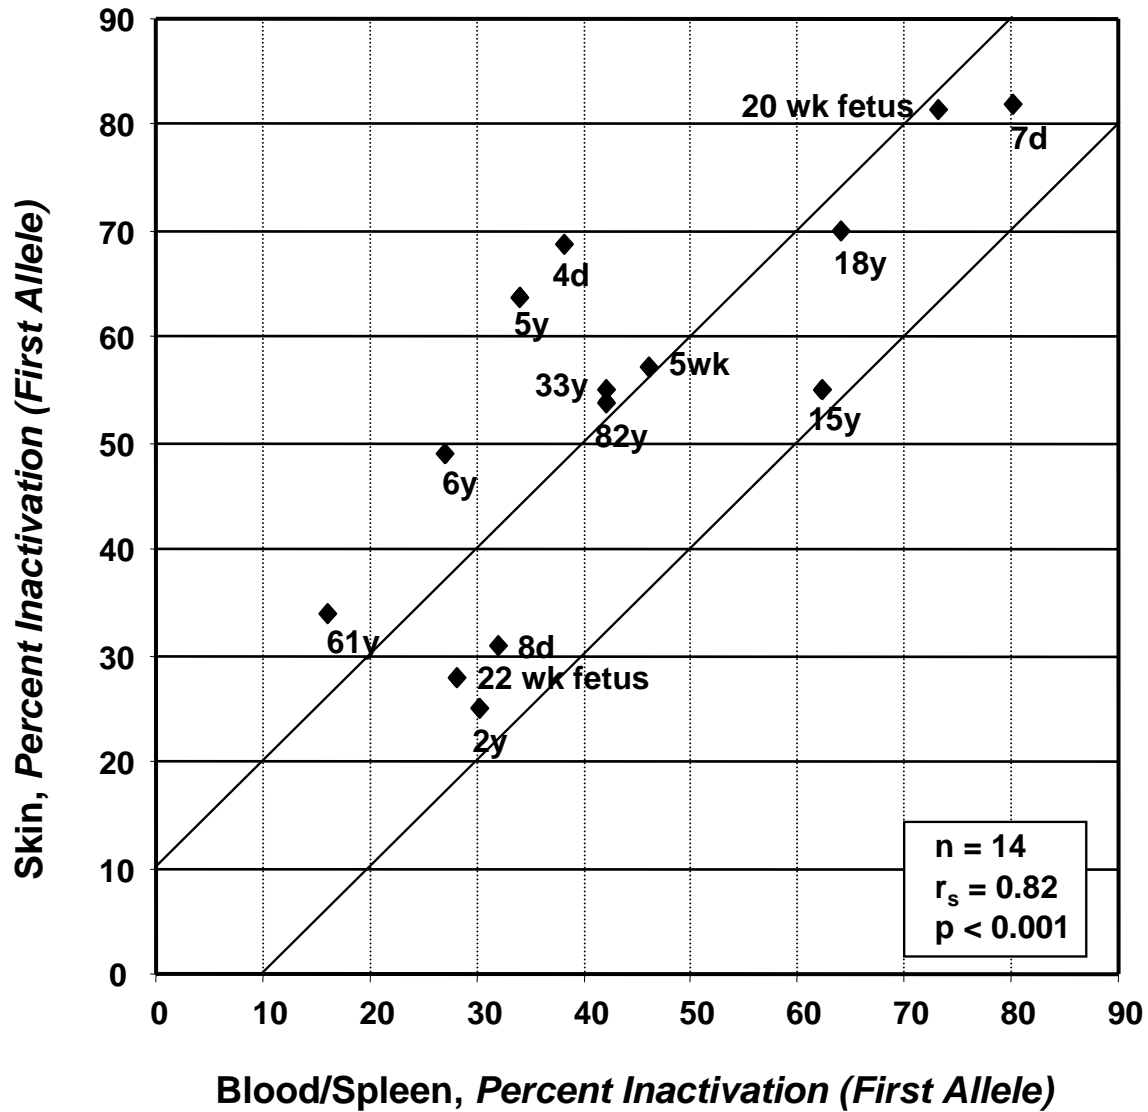

Supplementary Figure 1

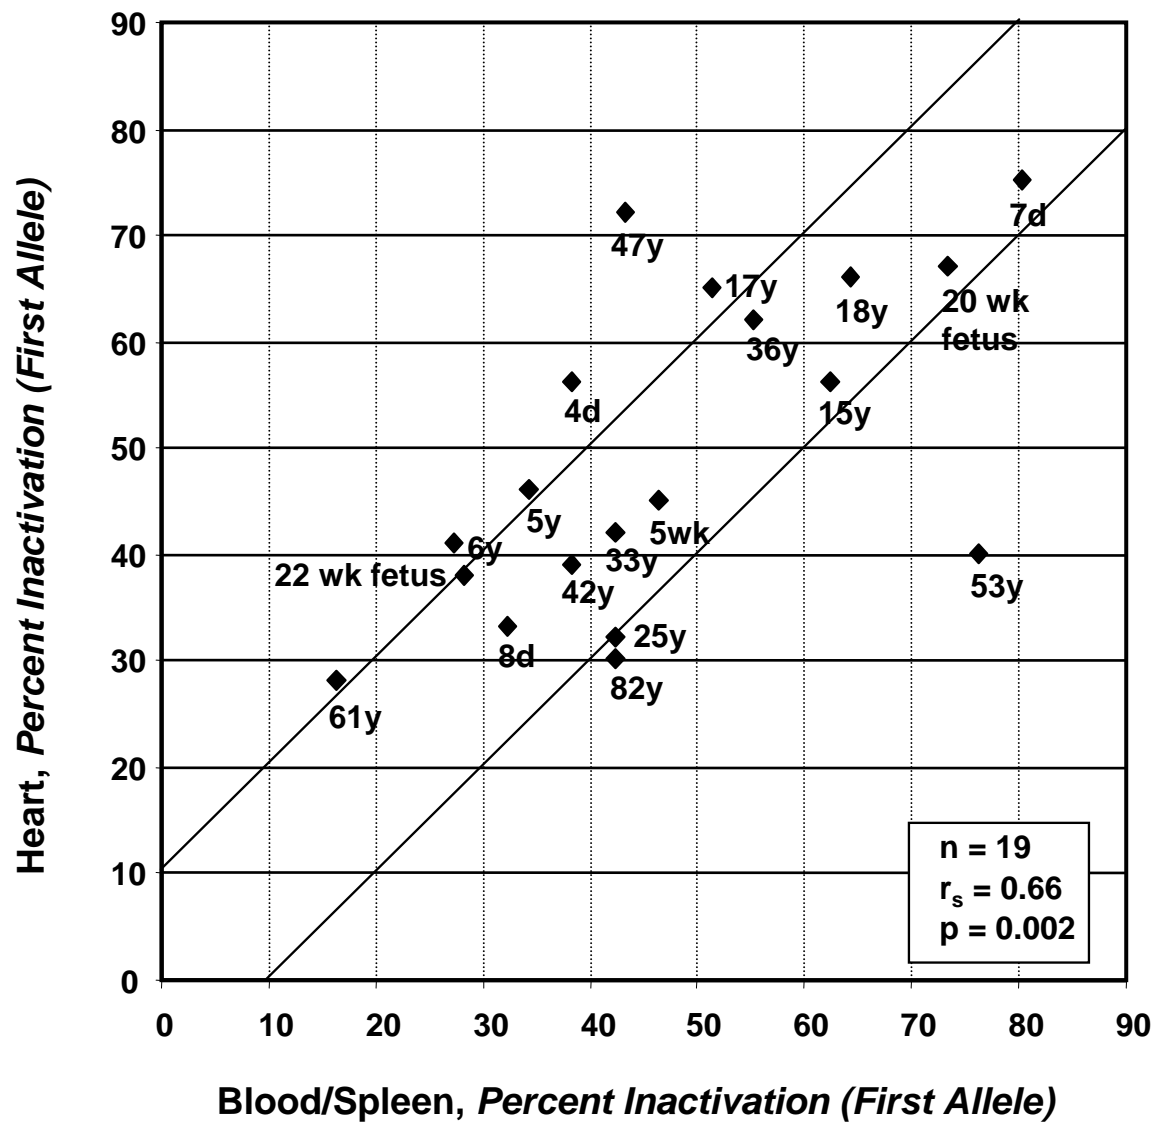

Supplementary Figure 2

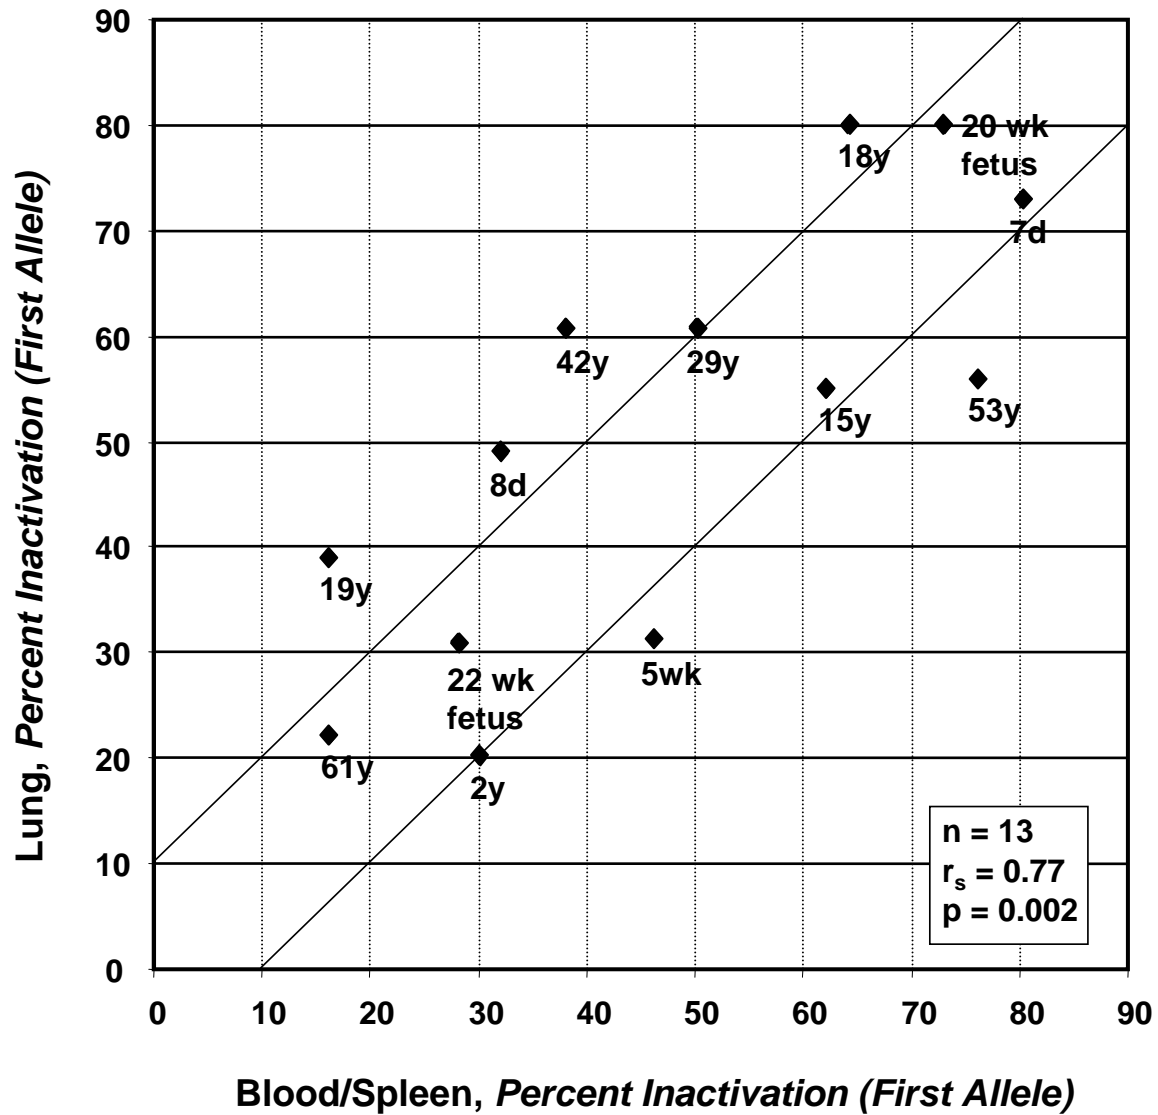

Supplementary Figure 3

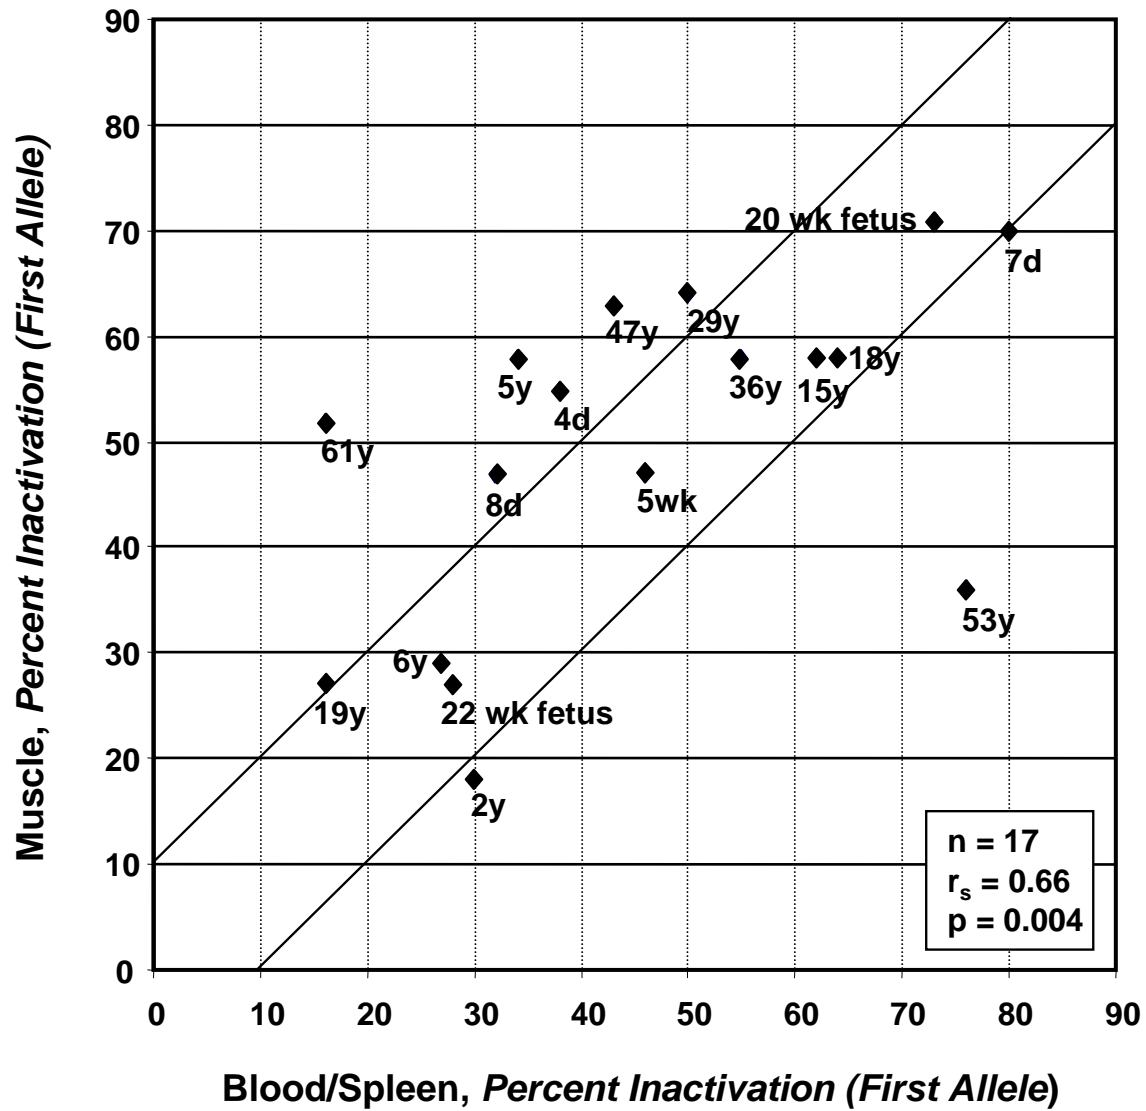

Supplementary Figure 4

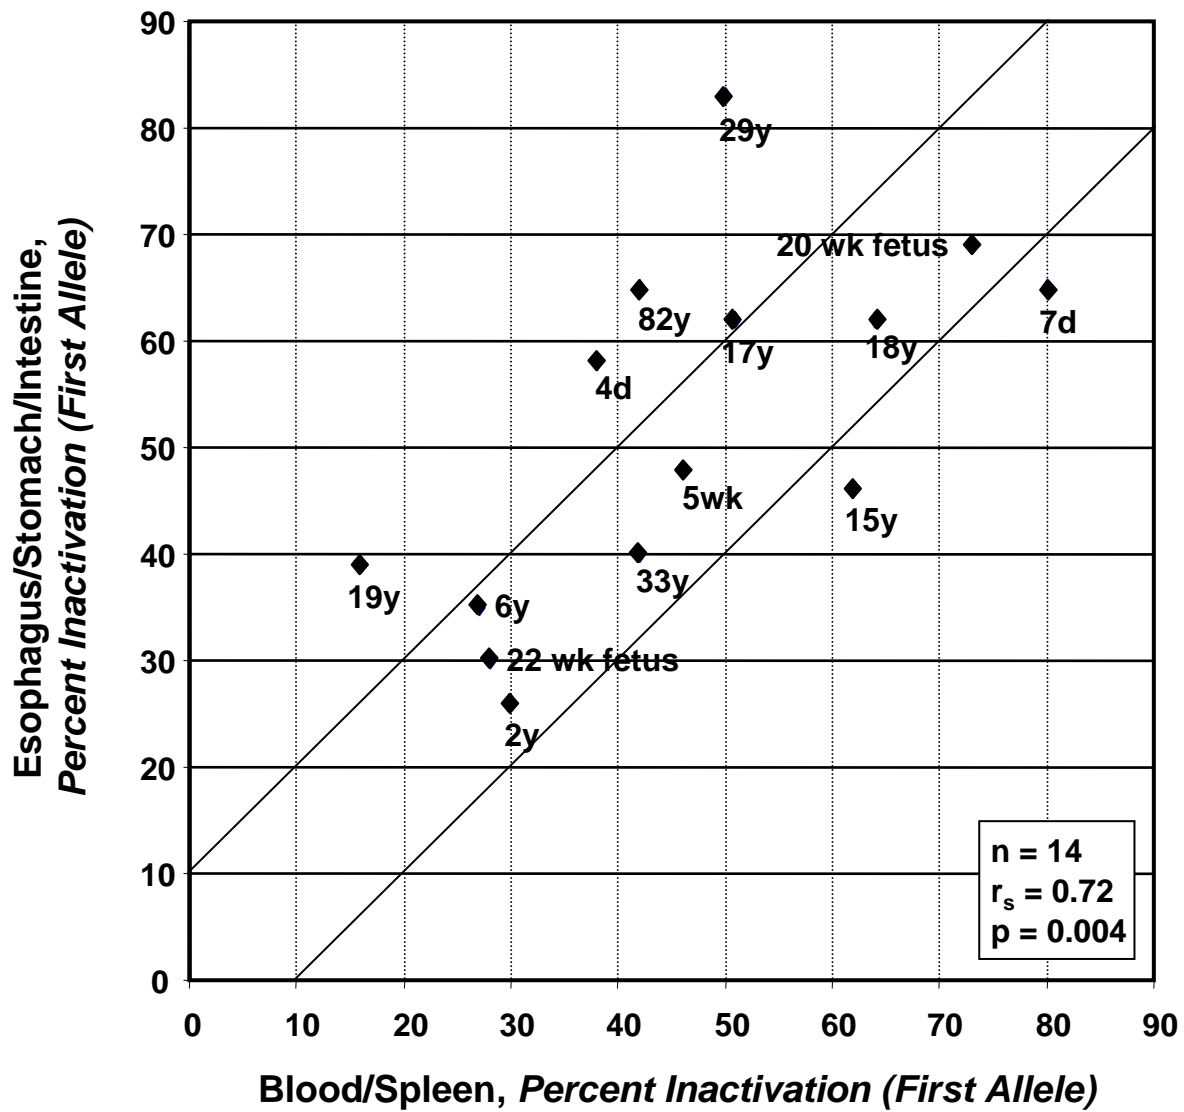

Supplementary Figure 5

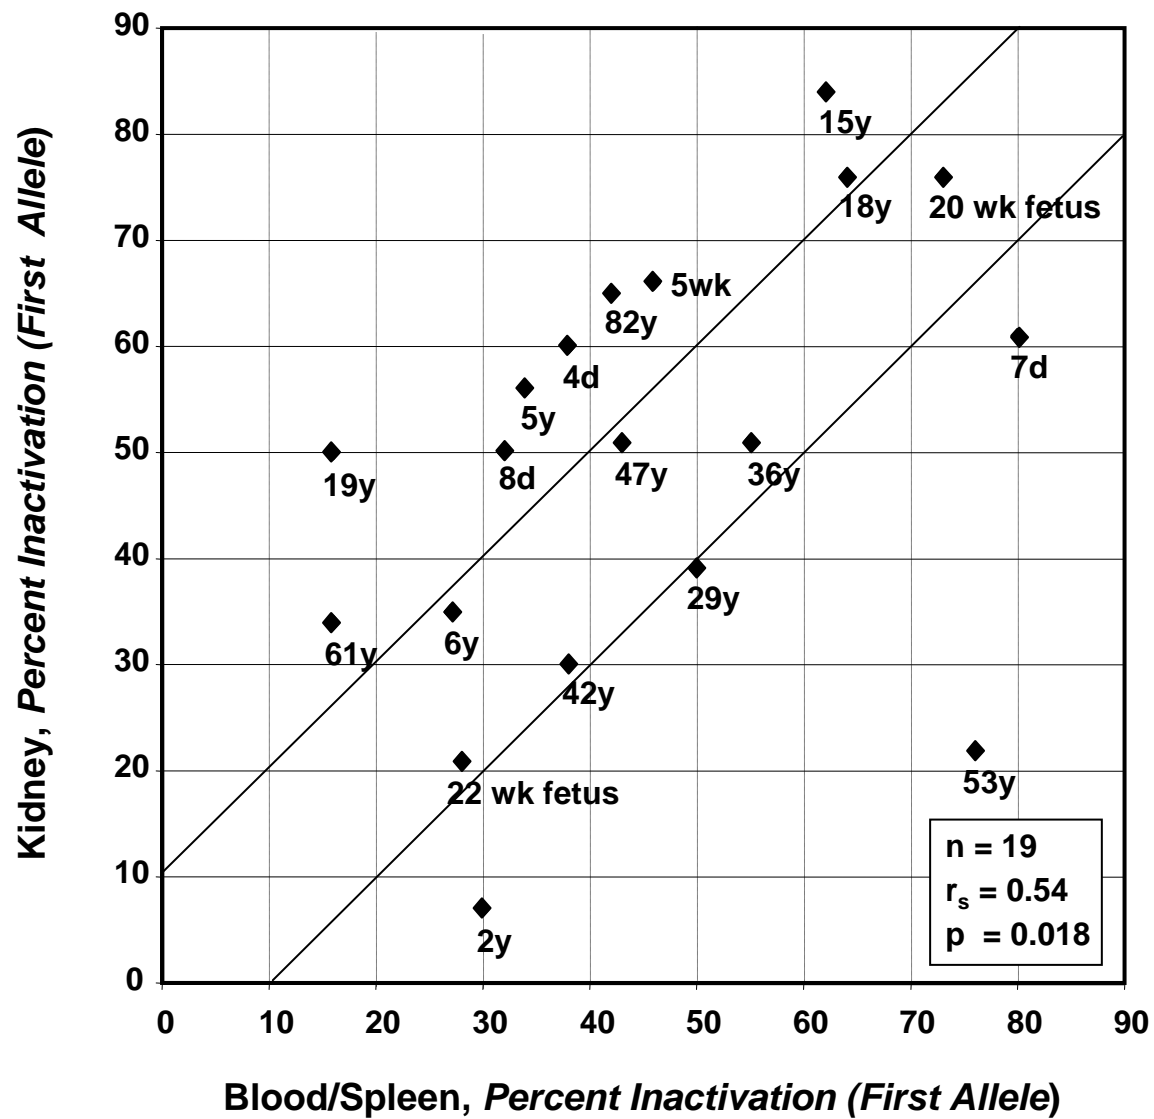

Supplementary Figure 6

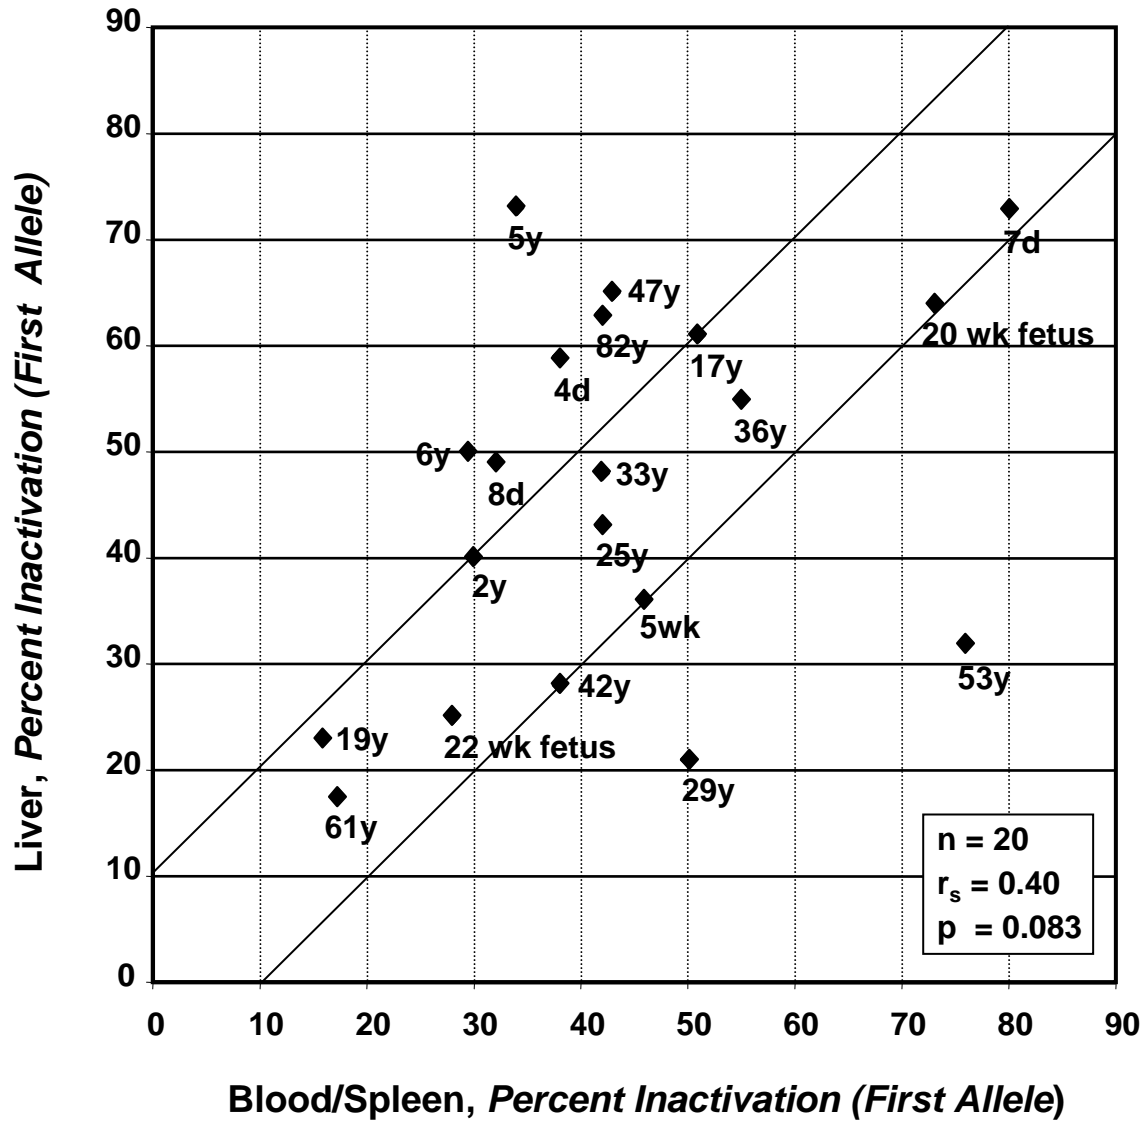

Supplementary Figure 7
